# Supplementary material for: Juçara Fruit (Euterpe Edulis Martius) Valorization Combining Emergent Extraction Technologies and Aqueous Solutions of Alkanediols
Source: MDPI journal article supplement (doi:10.3390/molecules28041607), 2023-02-07
Supplement: s1 [file s1]

# Supplementary Materials

Article

## Juçara Fruit (*Euterpe edulis* Martius) Valorization Combining Emergent Extraction Technologies and Aqueous Solutions of Alkanediols

Bruna P. Soares <sup>1,2</sup>, Ana M. Ferreira <sup>1</sup>, Marina Justí <sup>1</sup>, Luiz Gustavo Gonçalves Rodrigues <sup>2</sup>,  
J. Vladimir Oliveira <sup>2</sup>, Simão P. Pinho <sup>3,4,\*</sup> and João A. P. Coutinho <sup>1</sup>

<sup>1</sup> CICECO—Aveiro Institute of Materials, Department of Chemistry, University of Aveiro, 3810-193 Aveiro, Portugal

<sup>2</sup> Laboratory of Thermodynamics and Supercritical Technology (LATESC), Department of Chemical and Food Engineering (EQA), Federal University of Santa Catarina (UFSC), Florianópolis 88040-900, Brazil

<sup>3</sup> Centro de Investigação de Montanha (CIMO), Instituto Politécnico de Bragança, Campus de Santa Apolónia, 5300-253 Bragança, Portugal

<sup>4</sup> Laboratório para a Sustentabilidade e Tecnologia em Regiões de Montanha, Instituto Politécnico de Bragança, Campus de Santa Apolónia, 5300-253 Bragança, Portugal

\* Correspondence: spinho@ipb.pt

## Figures

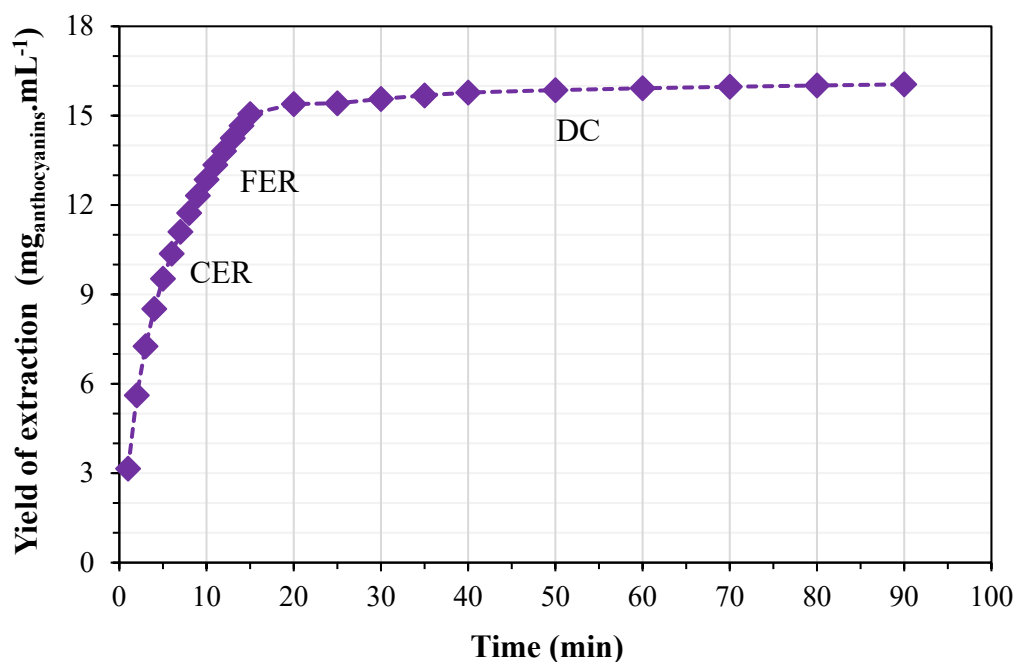

**Figure S1.** Kinetics assays of juçara pulps at 10 MPa, 80°C and 1 mL.min<sup>-1</sup> for PLE and the identified mass-transfer mechanisms: CER - constant extraction rate period, FER - falling extraction rate period, DC - diffusion-controlled period.

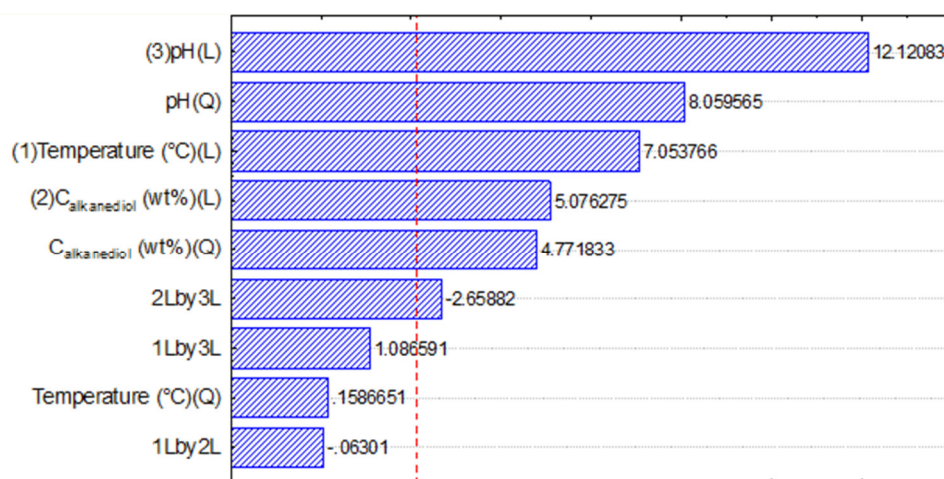

**Figure S2:** Pareto Chart of the CCRD (2<sup>3</sup>) regarding the yield of anthocyanins by PLE method.

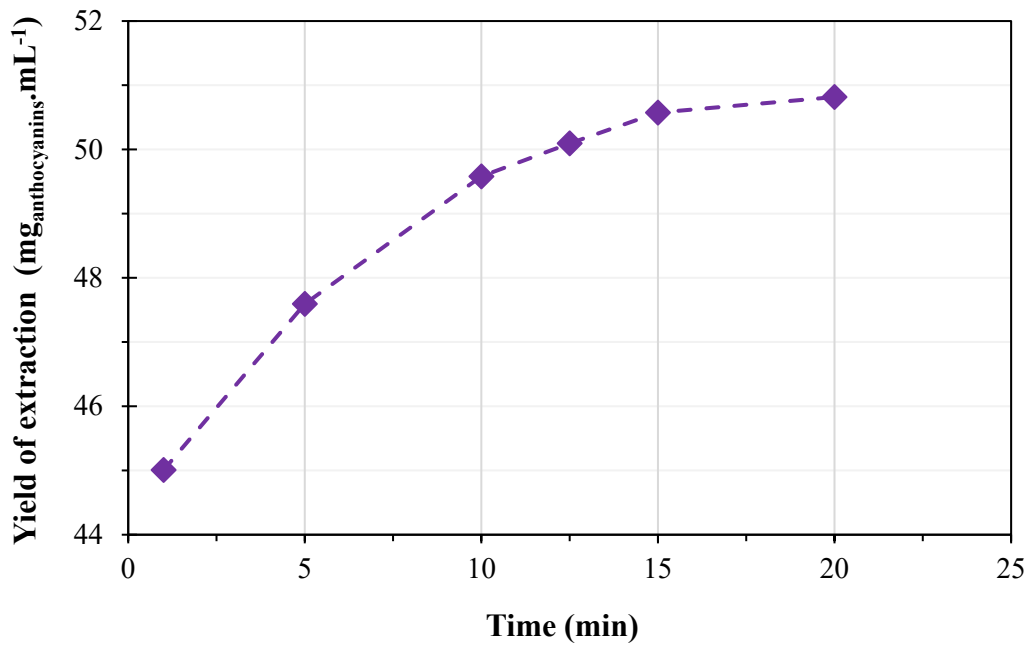

Figure S3: Kinetics assays of juçara pulps at 30% of amplitude for UAE.

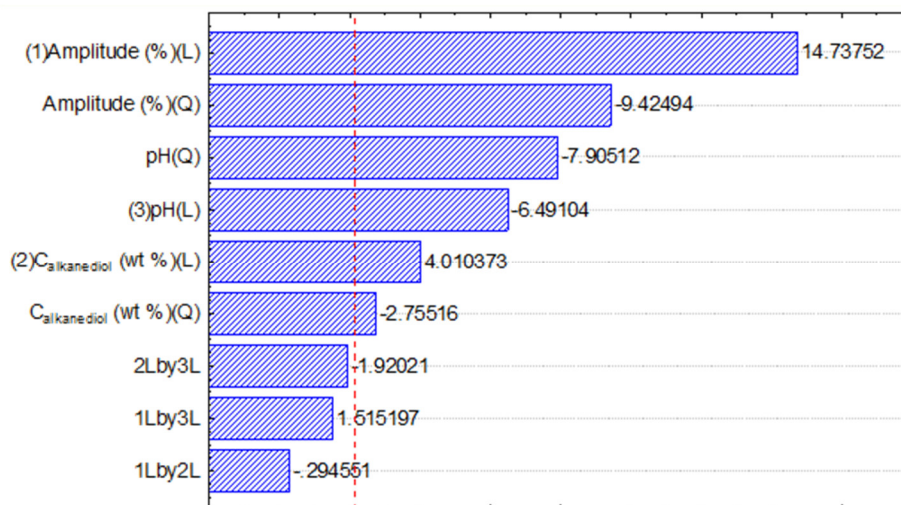

Figure S4: Pareto Chart of the CCRD (2<sup>3</sup>) regarding the yield of anthocyanins by UAE method.

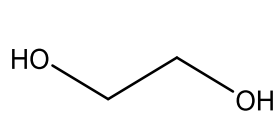

1,2-Ethanediol

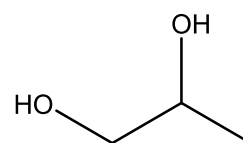

1,2-Propanediol

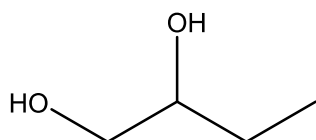

1,2-Butanediol

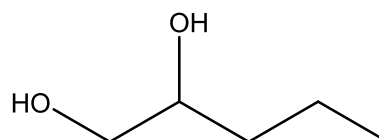

1,2-Pentanediol

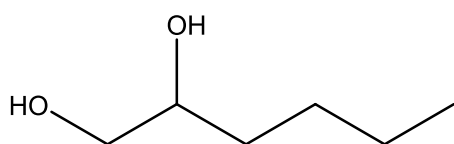

1,2-Hexanediol

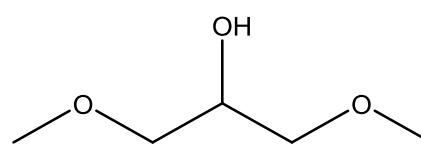

1,3-dimethoxypropan-2-ol [1.0.1]

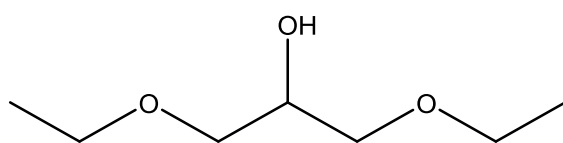

1,3-diethoxypropan-2-ol [2.0.2]

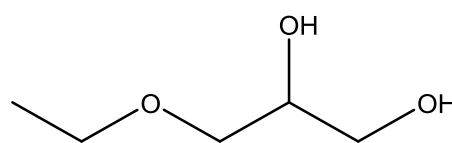

3-Ethoxypropane-1,2-diol [2.0.0]

**Figure S5:** Chemical structure of the alkanediols and glycerol ethers used in this work as extractive solvents.

## Tables

**Table S1:** Regression coefficients and statistical parameters of the multiple regression of PLE responses in the Central Composite Rotatable Design (CCRD).

| Response variables                                                                                                    | Factors                        | Regression coefficient | Standard error | t-value  | p-value  | Lower limit | Upper limit |
|-----------------------------------------------------------------------------------------------------------------------|--------------------------------|------------------------|----------------|----------|----------|-------------|-------------|
| Yield of extraction of anthocyanins<br>( $\text{mg}_{\text{anthocyanins}} \cdot \text{g}_{\text{dry biomass}}^{-1}$ ) | Constant                       | 12.38716               | 1.668534       | 7.42398  | 0.001757 | 8.83010     | 15.94421    |
|                                                                                                                       | x <sub>1</sub>                 | 0.05881                | 0.008330       | 7.05959  | 0.002124 | 0.04105     | 0.07656     |
|                                                                                                                       | x <sub>2</sub> <sup>2</sup>    | 0.00320                | 0.000523       | 6.10938  | 0.003633 | 0.00208     | 0.00431     |
|                                                                                                                       | x <sub>3</sub>                 | -3.14282               | 0.689633       | -4.55723 | 0.010361 | -4.61301    | -1.67263    |
|                                                                                                                       | x <sub>3</sub> <sup>2</sup>    | 0.59853                | 0.073937       | 8.09514  | 0.001266 | 0.44091     | 0.75615     |
|                                                                                                                       | x <sub>2</sub> .x <sub>3</sub> | -0.02983               | 0.006971       | -4.27947 | 0.012853 | -0.04469    | -0.01497    |
| R <sup>2</sup>                                                                                                        | 0.81                           |                        |                |          |          |             |             |
| adjusted R <sup>2</sup>                                                                                               | 0.74                           |                        |                |          |          |             |             |
| F <sub>calculated</sub>                                                                                               | 26.99                          |                        |                |          |          |             |             |
| p-value                                                                                                               | 1.89*10 <sup>-6</sup>          |                        |                |          |          |             |             |
| p <sub>model</sub>                                                                                                    | < 0.1                          |                        |                |          |          |             |             |

Note – x<sub>1</sub>: temperature (°C); x<sub>2</sub>: C<sub>alkanediol</sub> (wt%); x<sub>3</sub>: pH. Confidence level 90%.

**Table S2.** Regression coefficients and statistical parameters of multi regression adjustment of UAE responses in the Central Composite Rotatable Design (CCRD).

| Response variables                                                                                           | Factors                     | Regression coefficient | Standard error | t-value  | p-value  | Lower limit | Upper limit |
|--------------------------------------------------------------------------------------------------------------|-----------------------------|------------------------|----------------|----------|----------|-------------|-------------|
| Yield of extraction of anthocyanins<br>(mg <sub>anthocyanins</sub> .g <sub>dry biomass</sub> <sup>-1</sup> ) | Constant                    | 27.25774               | 1.570059       | 17.36097 | 0.000065 | 23.91062    | 30.60487    |
|                                                                                                              | x <sub>1</sub>              | 0.82742                | 0.068345       | 12.10644 | 0.000267 | 0.68172     | 0.97312     |
|                                                                                                              | x <sub>1</sub> <sup>2</sup> | -0.01053               | 0.001117       | -9.42494 | 0.000707 | -0.01291    | -0.00815    |
|                                                                                                              | x <sub>2</sub>              | 0.15912                | 0.043657       | 3.64482  | 0.021871 | 0.06605     | 0.25219     |
|                                                                                                              | x <sub>2</sub> <sup>2</sup> | -0.00194               | 0.000706       | -2.75516 | 0.051103 | -0.00345    | -0.00044    |
|                                                                                                              | x <sub>3</sub>              | 1.60348                | 0.250899       | 6.39095  | 0.003077 | 1.06860     | 2.13836     |
|                                                                                                              | x <sub>3</sub> <sup>2</sup> | -0.13904               | 0.017589       | -7.90512 | 0.001385 | -0.17654    | -0.10155    |
| R <sup>2</sup>                                                                                               | 0.95                        |                        |                |          |          |             |             |
| adjusted R <sup>2</sup>                                                                                      | 0.93                        |                        |                |          |          |             |             |
| F <sub>calculated</sub>                                                                                      | 30.26                       |                        |                |          |          |             |             |
| p-value                                                                                                      | 9.36*10 <sup>-7</sup>       |                        |                |          |          |             |             |
| p <sub>model</sub>                                                                                           | < 0.1                       |                        |                |          |          |             |             |

Note – x<sub>1</sub>: amplitude (%); x<sub>2</sub>: Calkanediol (wt %); x<sub>3</sub>: pH. Confidence level 90%.

**Table S3:** Temperature average for each different amplitude and the corresponding standard deviation (s) of the assays of the Central Composite Rotatable Design (CCRD) by UAE.

| <b>Amplitude (%)</b> | <b>Final temperature average (°C) ± s</b> |
|----------------------|-------------------------------------------|
| 10                   | 67.8                                      |
| 18                   | 92 ± 4                                    |
| 30                   | 93 ± 2                                    |
| 42                   | 97 ± 3                                    |
| 50                   | 99.1                                      |

**Table S4:** Initial pH (42.6 wt.% of solvent) and final extract pH for different solvents by UAE.

| <b>Solvent</b>  | <b>Initial solvent/water mixture pH (before adjusting)</b> | <b>Final extract pH</b> |
|-----------------|------------------------------------------------------------|-------------------------|
| Water           | 5.65                                                       | 4.12                    |
| 1,2-ethanediol  | 6.44                                                       | 4.35                    |
| 1,2-propanediol | 6.88                                                       | 4.49                    |
| 1,2-butanediol  | 6.63                                                       | 4.47                    |
| 1,2-pentanediol | 6.30                                                       | 4.45                    |
| 1,2-hexanediol  | 6.22                                                       | 4.31                    |
| Ethanol         | 7.28                                                       | 4.53                    |
| [1.0.1]         | 3.75                                                       | 4.82                    |
| [2.0.2]         | 3.60                                                       | 4.72                    |
| [2.0.0]         | 7.67                                                       | 4.56                    |
